# Supplementary material for: Water effect on the band edges of anatase TiO2 surfaces: A theoretical study on charge migration across surface heterojunctions and facet-dependent photoactivity
Source: Royal Society of Chemistry journal article supplement (doi:10.1039/d3cp03662f), 2023-01-01
Supplement: d3cp03662f1.pdf [file d3cp03662f1.pdf]

## Supplementary Information

### Water effect on band edges of anatase TiO<sub>2</sub> surfaces: Theoretical study on charge migration across surface heterojunctions and facet-dependent photoactivity

Jie-Qiong Li,<sup>a,b\*</sup> Jin-Yuan Hu,<sup>b</sup> Jun Cheng<sup>b\*</sup>

<sup>a</sup>State Henan Engineering Center of New Energy Battery Materials, Henan D&A Engineering Center of Advanced Battery Materials, College of Chemistry and Chemical Engineering, Shangqiu Normal University, Shangqiu 476000, China

<sup>b</sup>State Key Laboratory of Physical Chemistry of Solid Surfaces, *i*ChEM, College of Chemistry and Chemical Engineering, Xiamen University, Xiamen 361005, China

\*Corresponding authors. E-mail: [lijqchem@foxmail.com](mailto:lijqchem@foxmail.com) (J.-Q. Li)

[chengjun@xmu.edu.cn](mailto:chengjun@xmu.edu.cn) (J. Cheng)

#### Details of TiO<sub>2</sub>/water interface model construction

Construction of the initial configuration for the TiO<sub>2</sub>/water interface consisted of the following steps: (i) we added one monolayer (1 ML) of water molecules on both sides of the TiO<sub>2</sub> slab; (ii) we constructed an orthorhombic box containing an appropriate number of water molecules with a surface area that matches that of the semiconductor slab using the PACKMOL package;<sup>1</sup> (iii) we performed classical molecular dynamics (MD) simulations for the water box using the Lennard-Jones potential with the CP2K package;<sup>2</sup> and (iv) after a pre-equilibrium with classical MD simulation, we inserted the water box into the 1 ML model to generate the full semiconductor/water interface. For more detailed parameter settings of the TiO<sub>2</sub>/water interfaces models with anatase (101), (100) and (001) surfaces, one can refer the descriptions in ref 3.

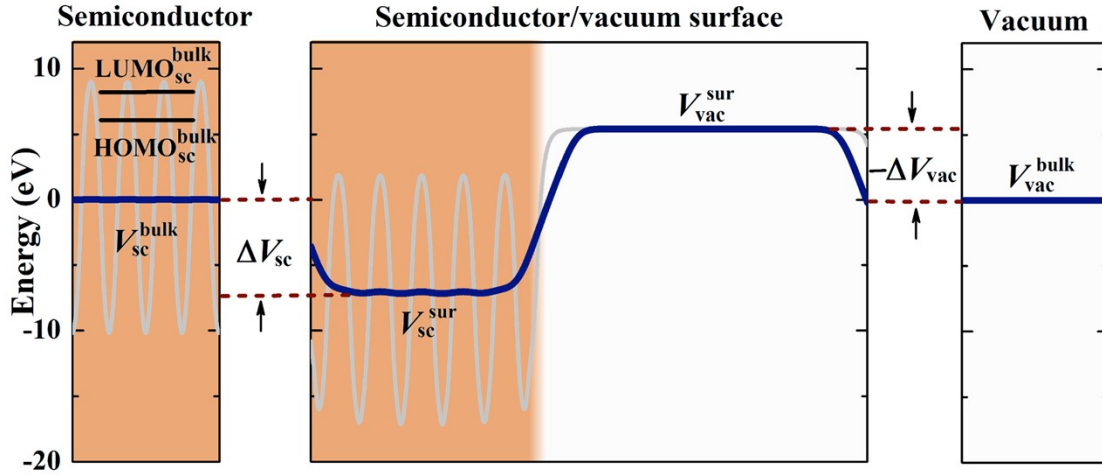

**Fig. S1** Schematic representation of the band alignment at the semiconductor/vacuum surface. The gray curves are the electrostatic potential energies, the dark blue lines indicate the average electrostatic potential obtained by nanosmoothing the original potential profile with the MACROAVE code.  $\Delta V_{sc}$  is the electrostatic potential shift of the semiconductor defined as  $V_{sc}^{bulk} - V_{sc}^{sur}$  and  $\Delta V_{vac}$  is the electrostatic potential shift of the vacuum defined as  $V_{vac}^{bulk} - V_{vac}^{sur}$ .  $V_{vac}^{bulk}$  is the electrostatic potential in bulk vacuum ( $V_{vac}^{bulk} = 0$ ).

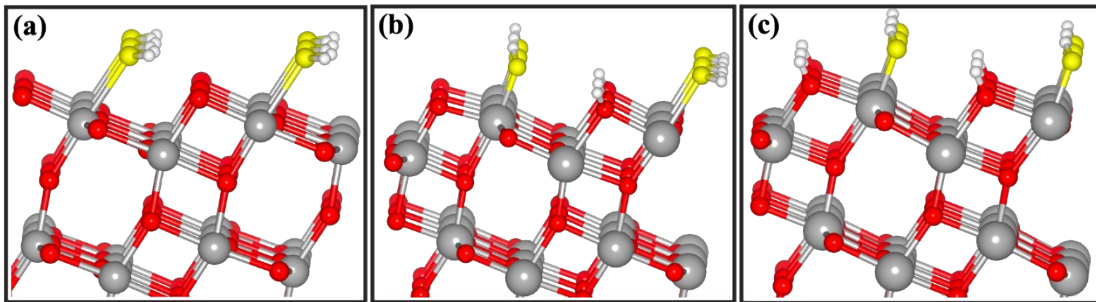

**Fig. S2** Optimized structures (side view) of different water adsorption states on anatase (101) surface. (a) molecular state; (b) mixed molecular-dissociative state; (c) fully dissociative state. Ti, O atoms in  $\text{TiO}_2$  and H, O atoms in  $\text{H}_2\text{O}$  are distinguished in grey, red, white and yellow, respectively.

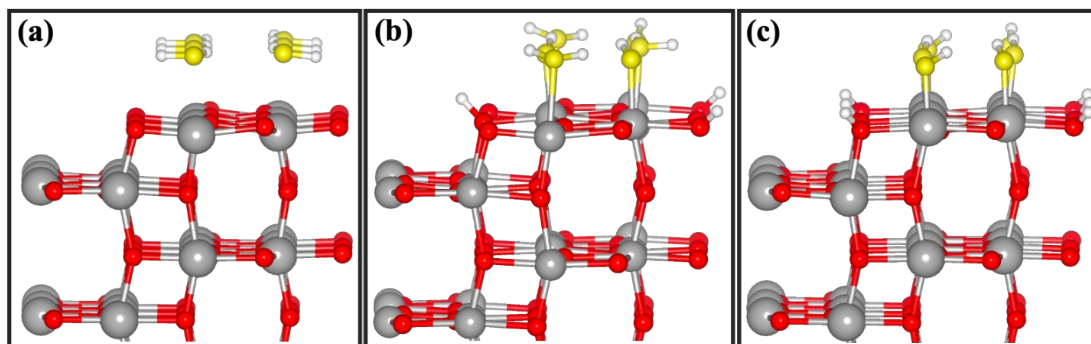

**Fig. S3** Optimized structures (side view) of different water adsorption states on anatase (100) surface. (a) molecular state; (b) mixed molecular-dissociative state; (c) fully dissociative state. Ti, O atoms in  $\text{TiO}_2$  and H, O atoms in  $\text{H}_2\text{O}$  are distinguished in grey, red, white and yellow, respectively.

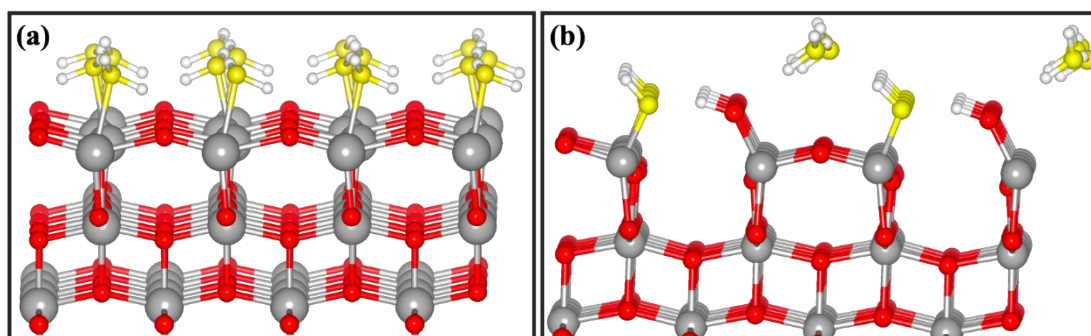

**Fig. S4** Optimized structures (side view) of different water adsorption states on anatase (001) surface. (a) molecular state; (b) mixed molecular-dissociative state. Ti, O atoms in  $\text{TiO}_2$  and H, O atoms in  $\text{H}_2\text{O}$  are distinguished in grey, red, white and yellow, respectively.

**Table S1** Band edges relative to vacuum level of the bare anatase  $\text{TiO}_2$  surfaces and surfaces with different water adsorption states computed with the GGA-PBE functional.

| Surface | No water |       | 1 ML $\text{H}_2\text{O}_{\text{mol}}$ |       | 1 ML $\text{H}_2\text{O}_{\text{dis}}$ |       | 1 ML $\text{H}_2\text{O}_{\text{mix}}$ |       |
|---------|----------|-------|----------------------------------------|-------|----------------------------------------|-------|----------------------------------------|-------|
|         | VBM      | CBM   | VBM                                    | CBM   | VBM                                    | CBM   | VBM                                    | CBM   |
| (101)   | -7.33    | -5.27 | -6.63                                  | -4.57 | -6.48                                  | -4.42 | -6.43                                  | -4.37 |
| (100)   | -6.91    | -4.85 | -5.92                                  | -3.86 | -6.30                                  | -4.24 | -6.01                                  | -3.95 |
| (001)   | -6.96    | -4.90 | -6.17                                  | -4.11 | *                                      | *     | -6.23                                  | -4.17 |

**Table S2** Band edges relative to vacuum level of the bare anatase TiO<sub>2</sub> surfaces (TiO<sub>2</sub>/vac), the surfaces with the stable adsorption of one monolayer water molecules (TiO<sub>2</sub>-1 ML water/vac) and the anatase TiO<sub>2</sub>/water interfaces computed with the GGA-PBE functional.

| Surface | TiO <sub>2</sub> /vac |       | TiO <sub>2</sub> -1 ML water /vac |       | TiO <sub>2</sub> /water |       |
|---------|-----------------------|-------|-----------------------------------|-------|-------------------------|-------|
|         | VBM                   | CBM   | VBM                               | CBM   | VBM                     | CBM   |
| (101)   | -7.33                 | -5.27 | -6.63                             | -4.57 | -5.91                   | -3.85 |
| (100)   | -6.91                 | -4.85 | -6.01                             | -3.95 | -5.54                   | -3.48 |
| (001)   | -6.96                 | -4.90 | -6.23                             | -4.17 | -5.80                   | -3.74 |

**Table S3** Band edges relative to vacuum level of the bare anatase TiO<sub>2</sub> surfaces (TiO<sub>2</sub>/vac), the surfaces with the adsorption of one monolayer water molecules (TiO<sub>2</sub>-1ML water/vac) and the anatase TiO<sub>2</sub>/water interfaces computed with the hybrid HSE06 functional.

| Surface | TiO <sub>2</sub> /vac |       | TiO <sub>2</sub> -1 ML water/vac |       | TiO <sub>2</sub> /water |       |
|---------|-----------------------|-------|----------------------------------|-------|-------------------------|-------|
|         | VBM                   | CBM   | VBM                              | CBM   | VBM                     | CBM   |
| (101)   | -8.34                 | -4.84 | -7.64                            | -4.14 | -6.92                   | -3.42 |
| (100)   | -7.92                 | -4.42 | -7.02                            | -3.52 | -6.55                   | -3.05 |
| (001)   | -7.97                 | -4.47 | -7.24                            | -3.74 | -6.81                   | -3.31 |

## References

- 1 L. Martínez, R. Andrade, E. G. Birgin, and J. M. Martínez, *J. Comput. Chem.*, 2009, **30**, 2157–2164.
- 2 J. Vandevondele, M. Krack, F. Mohamed, M. Parrinello, T. Chassaing and J. Hutter, *Comput. Phys. Commun.*, 2005, **167**, 103–128.
- 3 J. Q. Li, Y. Sun and J. Cheng, *J. Mater. Chem. A*, 2023, **11**, 943–952.
